# Supplementary material
Source: Springer Nature journal article supplement (https://www.springermedizin.de/resource/supplementary/12950_2011_291_MOESM2_ESM.pdf/9557478)

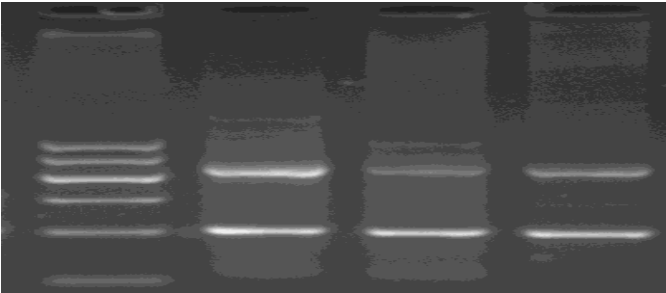

**SP-A (439 bp)**

**GAPDH (200 bp)**

**M**

**1**

**2**

**3**

Supplement: MOESM2 [file 9557478]
